# Supplementary material for: A new organic–inorganic hybrid perovskite ferroelectric [ClCH2CH2N(CH3)3][PbBr3] and Its PVDF matrix-assisted highly-oriented flexible ferroelectric films
Source: Royal Society of Chemistry journal article supplement (doi:10.1039/d2nj03613d), 2022-01-01
Supplement: d2nj03613d1.pdf [file d2nj03613d1.pdf]

## Supporting Information

### A New Organic-Inorganic Hybrid Perovskite Ferroelectric [ClCH<sub>2</sub>CH<sub>2</sub>N(CH<sub>3</sub>)<sub>3</sub>][PbBr<sub>3</sub>] and Its PVDF Matrix-assisted Highly- oriented Flexible Ferroelectric Films

Duo-Fu Li, Peng-Ju Zhao, Xiang-Hong Deng, Yao-Zhen Wu, Xiao-Li He, Dong-Sheng Liu, Yong-Xiu Li and Yan Sui

#### Calculation of the polarization of CEPbBr with a point charge model

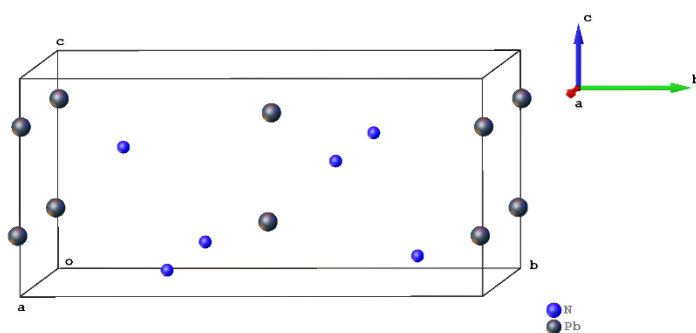

**Figure S1.** Atoms distribution of low-temperature phase of **CEPbBr** at 223 K for the calculation of polarization with a point charge model.

According to the crystal structure data collected at 223 K, we select a unit cell and make an assumption that the positive charge of [ClCH<sub>2</sub>CH<sub>2</sub>N(CH<sub>3</sub>)<sub>3</sub>]<sup>+</sup> and the negative charge of [PbBr<sub>3</sub>]<sup>-</sup> is on the N atom and Pb atom, respectively.

| Atoms | Coordinate |     |      | Center coordinate |
|-------|------------|-----|------|-------------------|
| Pb    | 0.5        | 0.5 | 0.28 | (0.5,0.5,0.53)    |
| Pb    | 1          | 1   | 0.78 |                   |
| Pb    | 1          | 0   | 0.28 |                   |
| Pb    | 0          | 1   | 0.28 |                   |
| Pb    | 0          | 0   | 0.28 |                   |
| Pb    | 1          | 1   | 0.28 |                   |

|    |     |       |      |                |
|----|-----|-------|------|----------------|
| Pb | 1   | 0     | 0.78 | (0.5,0.5,0.37) |
| Pb | 0   | 0     | 0.78 |                |
| Pb | 0.5 | 0.5   | 0.78 |                |
| Pb | 0   | 1     | 0.78 |                |
| N  | 0.5 | 0.182 | 0.62 |                |
| N  | 0   | 0.318 | 0.12 |                |
| N  | 0   | 0.682 | 0.62 |                |
| N  | 1   | 0.682 | 0.62 |                |
| N  | 0.5 | 0.818 | 0.12 |                |
| N  | 1   | 0.318 | 0.12 |                |

According to the center coordinate, the polarization can only be calculated along  $c$  axis, it does not exist along  $a$  or  $b$  axis.

$$\begin{aligned}
 P_S &= \lim \frac{1}{V} \sum q_i r_i \\
 &= (q_{\text{Pb}} r_{\text{Pb}} + q_{\text{N}} r_{\text{N}}) / V \\
 &= [(-e \times 0.53) + (e \times 0.37)] \times 4 \times c / V \\
 &= [-0.16 \times 4 \times 1.6 \times 10^{-19} \times 8.747 \times 10^{-10} \text{ C m}] / (1259 \times 10^{-30} \text{ m}^3) \\
 &= -6.6 \times 10^{-2} \text{ C m}^{-2} \\
 |P_S| &= 6.6 \mu\text{C cm}^{-2}
 \end{aligned}$$

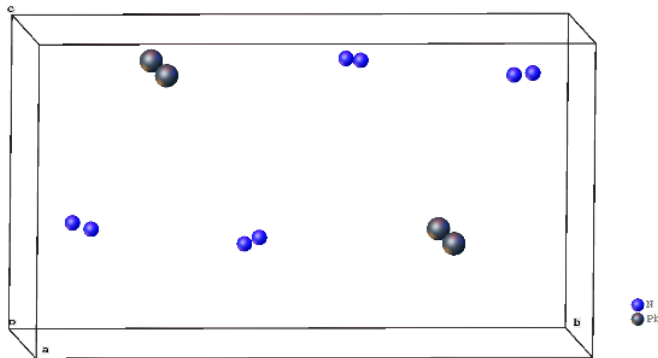

**Figure S2.** Atoms distribution of high-temperature phase of **CEPbBr** at 340 K for the calculation of polarization with a point charge model.

According to the crystal structure data collected at 340 K, we select a unit cell and

make an assumption that the positive charge of  $[\text{ClCH}_2\text{CH}_2\text{N}(\text{CH}_3)_3]^+$  and the negative charge of  $[\text{PbBr}_3]^-$  is on the N atom and Pb atom, respectively.

| Atoms | Coordinate |       |       | Center coordinate |
|-------|------------|-------|-------|-------------------|
| N     | 0.636      | 0.906 | 0.871 | (0.5,0.5,0.6145)  |
| N     | 0.136      | 0.594 | 0.871 |                   |
| N     | 0.864      | 0.406 | 0.371 |                   |
| N     | 0.562      | 0.876 | 0.858 |                   |
| N     | 0.062      | 0.624 | 0.858 |                   |
| N     | 0.364      | 0.094 | 0.371 |                   |
| N     | 0.938      | 0.376 | 0.358 |                   |
| N     | 0.438      | 0.124 | 0.358 |                   |
| Pb    | 0.055      | 0.248 | 0.857 | (0.5,0.5,0.607)   |
| Pb    | 0.555      | 0.252 | 0.857 |                   |
| Pb    | 0.445      | 0.748 | 0.357 |                   |
| Pb    | 0.945      | 0.752 | 0.357 |                   |

According to the center coordinate, the polarization can only be calculated along  $c$  axis, it does not exist along  $a$  or  $b$  axis.

$$\begin{aligned}
 P_S &= \lim_{V \rightarrow \infty} \frac{1}{V} \sum q_i r_i \\
 &= (q_{\text{Pb}} r_{\text{Pb}} + q_{\text{N}} r_{\text{N}}) / V \\
 &= [(-e \times 0.607) + (e \times 0.6145)] \times 2 \times c / V \\
 &= [0.0075 \times 2 \times 1.6 \times 10^{-19} \times 9.7334 \times 10^{-10} \text{ C m}] / (1330.500 \times 10^{-30} \text{ m}^3) \\
 &= 1.756 \times 10^{-3} \text{ C m}^{-2} \\
 |P_S| &= 0.1756 \mu\text{C cm}^{-2}
 \end{aligned}$$
